1           **Prenatal thyroid hormones accelerate postnatal growth and**  
2           **telomere shortening in wild great tits**

3  
4  
5  
6   Bin-Yan Hsu<sup>1</sup>, Nina Cossin-Sevrin<sup>1,2</sup>, Antoine Stier<sup>1,3\*</sup>, Suvi Ruuskanen<sup>1,4\*\$</sup>

7   <sup>1</sup> Department of Biology, University of Turku, Finland

8   <sup>2</sup> Université de Strasbourg, Centre National de la Recherche Scientifique, Institut  
9   Pluridisciplinaire Hubert Curien, UMR 7178, 67087 Strasbourg, France

10   <sup>3</sup> Univ Lyon, Université Claude Bernard Lyon 1, CNRS, ENTPE, UMR 5023 LEHNA, F-69622,  
11   Villeurbanne, France

12   <sup>4</sup> Department of Biological and Environmental Science, University of Jyväskylä

13  
14  
15   *\*joint senior authors*

16   <sup>§</sup>*Corresponding author: suvi.k.ruuskanen@gmail.com*

17   Running headline: Prenatal thyroid hormones shorten telomeres

18

19

20

21 **Abstract**

22 Early-life environment is known to affect later-life health and disease, which could be  
23 mediated by the early-life programming of telomere length, a key hallmark of ageing.  
24 According to the *fetal programming of telomere biology hypothesis*, variation in prenatal  
25 exposure to hormones is likely to influence telomere length. Yet the contribution of key  
26 metabolic hormones, *i.e.* thyroid hormones (THs), has been largely ignored. We recently  
27 showed that in contrast to predictions, exposure to elevated prenatal THs increased postnatal  
28 telomere length in wild collared flycatchers, but the generality of such effect, its underlying  
29 proximate mechanisms and consequences on survival have not been investigated. We  
30 therefore conducted a comprehensive study evaluating the impact of THs on potential drivers  
31 of telomere dynamics (growth, post-natal THs, mitochondria and oxidative stress), telomere  
32 length and medium-term survival using wild great tits as a model system. While prenatal THs  
33 did not significantly affect telomere length after hatching (*i.e.* day 7), they influenced postnatal  
34 telomere shortening (*i.e.* shorter telomeres at day 14 and the following winter) but not  
35 apparent survival. Circulating THs, mitochondrial density or oxidative stress biomarkers were  
36 not significantly influenced, whereas TH-supplemented group showed accelerated growth,  
37 which may explain the observed delayed effect on telomeres. We discuss several alternative  
38 hypotheses that may explain the contrast with our previous findings in flycatchers. Given that  
39 shorter telomeres in early life tend to be carried until adulthood and are often associated with  
40 decreased survival prospects, the effects of prenatal THs on telomeres may have long-lasting  
41 effects on senescence.

42

43 Keywords: developmental programming, thyroid hormone, telomere, ageing, mitochondria,  
44 metabolism, oxidative stress, maternal effects

45

## 46 **Introduction**

47           Early-life environment has been repeatedly observed to affect adult health and  
48 survival prospects in human and non-human vertebrates (Barnes and Ozanne, 2011; Godfrey  
49 and Barker, 2001; Metcalfe and Monaghan, 2001). While the mechanisms underlying such  
50 delayed effects remained somewhat elusive (Barnes and Ozanne, 2011), the early-life  
51 programming of telomere length (i.e. the protective end caps of chromosomes) has emerged  
52 as a key candidate (Entringer et al., 2018). Telomere length is considered as a hallmark of  
53 ageing (López-Otín et al., 2013) since telomeres shorten with age, and shorter telomeres are  
54 often predictive of lower survival or lifespan in both epidemiological and experimental studies  
55 (Arbeev et al., 2020; Heidinger et al., 2012; Muñoz-Lorente et al., 2019; Wilbourn et al., 2018).  
56 The prenatal hormonal environment, such as exposure to elevated glucocorticoid levels, has  
57 been coined as an important factor influencing early-life telomere length and its associated  
58 long-term outcomes (Criscuolo et al., 2020; Hausmann et al., 2012; Marchetto et al., 2016;  
59 Parolini et al., 2019). While there has been a considerable interest in prenatal glucocorticoids  
60 (Hausmann et al. 2012; Tissier, Williams, and Criscuolo 2014; Noguera, da Silva, and Velando  
61 2020) and to a lesser extent androgens (Parolini et al., 2019; Tissier et al., 2014) in the context  
62 of the '*fetal programming of telomere biology*' hypothesis (Entringer et al., 2018), the  
63 potential impact of prenatal thyroid hormones has been mostly ignored so far (Stier et al.  
64 2020).

65           Thyroid hormones (THs) are key coordinators of development and metabolism  
66 (McNabb, 2007), which are transferred from mothers to offspring (Ruuskanen and Hsu, 2018).  
67 Variation in exposure to prenatal thyroid hormones (T3, triiodothyronine, and T4, thyroxine)  
68 could influence telomere length via several mutually non-exclusive proximate pathways: (i)  
69 Prenatal THs can stimulate growth (yet results are inconsistent across studies and species,

70 (Hsu et al., 2020, 2019a, 2017; Medici et al., 2013; Ruuskanen et al., 2016a; Sarraude et al.,  
71 2020a; Sarraude et al., 2020b; Vrijkotte et al., 2017; Zhang et al., 2019), which can directly  
72 contribute to telomere attrition through increasing cellular division (Monaghan and Ozanne,  
73 2018; Stier et al., 2020), or indirectly accelerate telomere shortening through increasing  
74 oxidative stress (Monaghan and Ozanne, 2018; Reichert and Stier, 2017; Smith et al., 2016).

75 (ii) Elevated TH levels are often associated with higher metabolic rates (Liu et al., 2006; Mullur  
76 et al., 2014; Welcker et al., 2013) and stimulate mitochondrial aerobic metabolism (Cioffi et  
77 al., 2013), both of which can potentially increase reactive oxygen species (ROS) and oxidative  
78 damage (Stier, Massemin, and Criscuolo 2014), accelerating telomere shortening (Reichert  
79 and Stier, 2017). It was recently shown that exposure to elevated prenatal TH levels can lead  
80 to a sex-specific increase in metabolic rate and circulating thyroid hormone levels shortly after  
81 hatching (rock pigeons *Columba livia*, Hsu et al. 2017, but see Ruuskanen et al. 2016), which  
82 suggests that prenatal hormones may program postnatal metabolism and TH-axis function.

83 (iii) The ‘metabolic telomere attrition hypothesis’ (Casagrande and Hau, 2019) postulates that  
84 telomere shortening might be adaptive and have signaling functions related to metabolic  
85 demand (*i.e.* accentuated shortening when catabolism is favored over anabolism via mTOR  
86 inhibition). Since THs can have both anabolic and catabolic actions (Mullur et al., 2014),  
87 predictions can be made in both directions between prenatal THs and telomere length. From  
88 an evolutionary perspective, increased offspring metabolism or growth, which may be  
89 beneficial for the mother/offspring, diverts resources from somatic maintenance if resources  
90 are limited. This can accelerate damage to biomolecules and/or decrease repair/maintenance  
91 processes, and therefore accentuate telomere shortening. Therefore, prenatal TH levels  
92 would be expected to vary in relation to predicted environmental conditions (as observed in

93 terms of temperature and laying order, e.g. Ruuskanen, Groothuis, et al. 2016; Hsu, Verhagen,  
94 et al. 2019) to optimize this trade-off.

95           In contrast to most predictions relating prenatal THs to telomere length (see above),  
96 we recently reported that prenatal exposure to experimentally elevated THs increased  
97 telomere length in nestlings of a wild passerine, the collared flycatcher (*Ficedula albicollis*,  
98 Stier et al. 2020). To better understand the potential generality of this surprising finding as  
99 well as assess underlying mechanisms and potential carry-over effects of variation in prenatal  
100 THs on later life-stages and survival, we conducted a more detailed study in another passerine  
101 species, the great tit (*Parus major*). The aim of this study was to comprehensively investigate  
102 the influence of prenatal THs on growth, oxidative stress, plasma THs, mitochondrial density  
103 and telomere dynamics as well as survival via an experimental manipulation of prenatal THs  
104 in a wild population. We monitored offspring multiple times during development and as  
105 juveniles a few months after fledging. Based on the majority of prior literature, we would  
106 predict that elevated prenatal THs could lead to faster growth, increased plasma THs,  
107 oxidative stress and mitochondrial density, ultimately accelerating telomere shortening.  
108 Alternatively, if our previous finding in the collared flycatcher reflected a general pattern, we  
109 would predict that despite accelerating growth, elevated prenatal THs could increase  
110 telomere length. We also predict that elevated prenatal TH could increase post-fledging  
111 survival of the juveniles (e.g. both due to accelerated postnatal growth and potential  
112 beneficial effects for thermoregulation under low autumn-winter temperatures). However,  
113 longer-term survival, that we were not able to evaluate here, could be decreased for example  
114 due to shorter telomeres. As a previous study in the same species reported sex-dependent  
115 effects of prenatal THs on growth (Ruuskanen et al., 2016), we may also expect the effects on  
116 physiology and survival to differ between sexes.

## 117 **Methods**

118           The experiment and all methods we used were in accordance with all relevant  
119 guidelines and regulations and have been approved by the Animal Experiment Board of the  
120 Administrative Agency of South Finland (ESAVI/2902/2018) and the Environmental Center of  
121 Southwestern Finland (license number VARELY549/2018). The experiment was conducted in  
122 2018 in a nest box population (314 nest-boxes distributed over seven forest plots) on the  
123 island of Ruissalo in southwestern Finland (60° 25' N, 22° 10' E).

124

### 125 Field experiment

126           The nest boxes were monitored with five-day intervals to track egg laying. Yolk T3 and  
127 T4 (i.e. a combined injection of the two hormones) levels were elevated in half of the nests (n  
128 = 21 TH nests and n = 21 control nests) by injection into the egg, following methods in  
129 Ruuskanen, Darras, et al. (2016). Control nests were injected with the vehicle (0.9% NaCl) only.  
130 The TH concentration in great tit eggs in the population is  $0.11 \pm 0.04$  ng/yolk for T3 and  
131  $0.96 \pm 0.29$  ng/yolk for T4 (Ruuskanen et al., 2019). We aimed to raise the amount of yolk TH  
132 by 2SD via injection into the egg yolk, a dose that has been recommended in relation to the  
133 natural hormone range of the study species (Podmokla et al., 2018). This corresponded to  
134 target doses of 0.041 ng/yolk for T3 and 0.325 ng/yolk for T4. To make sure injections would  
135 be performed on unincubated eggs mimicking maternal hormone levels (great tits can start  
136 incubation before the clutch is complete), injections were conducted on the day the 5<sup>th</sup> egg  
137 was laid to all eggs in the clutch. Thereafter, injections were conducted each day for the newly  
138 laid egg.

139 Hatching date and success was monitored by visiting nests daily starting before the  
140 estimated hatching day. Nestling body mass (~0.01g) and tarsus (~0.5 mm) were measured on  
141 day 2 (mass only), 7 and 14 post-hatching. All nestling measurements were conducted  
142 between 8 am and 2 pm. After measurements on day 2, nestlings were nail-coded and about  
143 half of the brood were cross-fostered with same-age nestlings in another nest (preferentially  
144 between control and TH treatments) to increase statistical power by having chicks from TH  
145 and control-injected eggs experiencing the same postnatal environment. On day 7 a blood  
146 sample (ca 40 $\mu$ l) was taken, kept on ice, centrifuged within 8 hours, and RBCs frozen at -80°C  
147 for molecular analyses (telomere length, mitochondrial density and molecular sexing). On day  
148 14 a small blood sample (10-15 $\mu$ l) was snap-frozen in liquid nitrogen for oxidative stress  
149 biomarker analyses and stored at -80°C, while the rest of the sample was kept on ice, and  
150 centrifuged. Plasma was used for TH analyses and RBCs for mitochondria and telomere  
151 measurements as above. After day 7 measurements half of the nest were subject to a  
152 temperature manipulation (nest temperature increased for *ca.* 2°C during day 7 – day 14) for  
153 the purposes of another study. To avoid potential confounding effects, we here only analyze  
154 data from the nests which were not temperature-manipulated for day 14 and in juveniles (N  
155 = 19 nests, 99 nestlings on day 14). Yet, for day 2 and day 7 measurements (prior to the  
156 temperature manipulation), we prefer to include all data (N = 41 nests, 218 nestlings on d2  
157 and 221 nestlings on d7) to make use of the larger sample size.

158 To study long-term effects of prenatal thyroid hormones and offspring apparent post-  
159 fledging survival, we recaptured great tits during the following autumn-winter using mist-  
160 netting. Seven feeding stations were mounted in the study plots in August, and nets were  
161 positioned close to the feeding stations. The distances between adjacent feeding stations  
162 were *ca.* 500 m, and most birds were captured at a different feeding station than their natal

163 forest plot. In addition, 5 birds were captured at a constant effort site > 3 km from the study  
164 plots, suggesting that all stations were potentially accessible to all birds. Circa 20 kg of peeled  
165 sunflower seeds and 2 kg of fat were provided at each station, checked and filled bi-weekly,  
166 and consumption noted. Only in a very few cases the feeders were completely empty. Mist-  
167 netting was conducted at each feeding station for 3 hours on three different days in  
168 September-October and similarly again in February, summing up to a total 126 hours of mist-  
169 netting. The time of day (morning/day/afternoon) was rotated for each site. Nets were  
170 checked every 30 minutes and mass (~0.01g), wing (~0.5 mm) were recorded for each bird. A  
171 small blood sample (40-60µl) was taken, kept on ice, centrifuged within 8 hours, and RBCs  
172 frozen at -80°C for telomere and mitochondria density analyses.

173

#### 174 Thyroid hormones and oxidative stress assays

175 Plasma thyroid hormones (triiodothyronine (T3), the biologically active form T3 and  
176 thyroxine (T4) a precursor, expressed as ng/mL) were measured from 14-day-old nestlings  
177 with nano-LC-MS/MS following Ruuskanen et al. (2019; 2018). Due to practical constraints, we  
178 randomly selected one to four nestling per nest, n = 13 TH and n = 11 control nestlings for  
179 analysis.

180 Total glutathione (tGSH), the most abundant intra-cellular antioxidant, and the ratio  
181 between reduced and oxidized glutathione (GSH:GSSG, an indicator of oxidative challenge)  
182 were measured from whole-blood samples with the ThioStar® Glutathione Fluorescent  
183 Detection Kit (K005-FI, Arbor Assays, USA) (Sarraude et al., 2020a). As a measure of oxidative  
184 damage, we assessed blood lipid peroxidation (malonaldehyde, MDA) using the TBARS-assay  
185 following Espin et al. (2017). Both measurements had CV% < 10 and are expressed per mg of  
186 protein (measured via BCA protein assay, ThermoFisher Scientific). Biomarkers of oxidative



187 stress were measured from 2 randomly selected nestlings per nest (n = 33 TH, n = 26 control  
188 nestlings).

189 qPCR assays for relative telomere length, mtDNA copy number and molecular sexing

190 We extracted DNA from blood cells using a standard salt extraction alcohol  
191 precipitation method (Aljanabi and Martinez, 1997). Extracted DNA was diluted in elution  
192 buffer BE for DNA preservation. DNA concentration and quality (260/280 > 1.80 and 260/230  
193 > 2.00) were checked with a ND-1000-Spectrophotometer (NanoDrop Technologies,  
194 Wilmington, USA). DNA integrity was verified in 24 samples chosen randomly using gel  
195 electrophoresis (50 ng of DNA, 0.8 % agarose gel at 100 mV for 60 min) and DNA staining with  
196 Midori Green. Each sample was then diluted to a concentration of 1.2 ng.μl<sup>-1</sup> for subsequent  
197 qPCR analysis.

198 Relative telomere length (*rTL*) and mitochondrial DNA copy number (*mtDNA<sub>cn</sub>*, an  
199 index of mitochondrial density) were quantified using qPCR. This technique estimates relative  
200 telomere length by determining the ratio (T/S) of telomere repeat copy number (T) to a single  
201 copy gene (SCG), and the relative *mtDNA<sub>cn</sub>* as the ratio between one mitochondrial gene and the  
202 same single copy gene. Here, we used RAG1 as a SCG (verified as single copy using a BLAST  
203 analysis on the great tit genome) and cytochrome oxidase subunit 2 (COI2) as a mitochondrial  
204 gene (verified as non-duplicated in the nuclear genome using a BLAST analysis). Forward and  
205 reverse telomere primers were 5'-CGGTTTGGTTGGGTTTGGGTTTGGGTTTGGGTTTGGGTT-3'  
206 (Tel-1b) and 5'-GGCTTGCCTTACCCTTACCCTTACCCTTACCCTTACCCT-3' (Tel-2b) respectively.  
207 Forward and reverse RAG1 primers were 5'-TCGGCTAAACAGAGGTGTA-3' and 5'-  
208 CAGCTTGGTGCTGAGATGTAT-3', respectively. Forward and reverse COI2 primers were 5'-  
209 CAAAGATATCGGCACCCTCTAC-3'; 5'- GCCTAGTTCTGCACGGATAAG-3', respectively. For the

210 qPCR assays, the reactions were performed on a 384-QuantStudio™ 12K Flex Real-Time PCR  
211 System (Thermo Fisher), in a total volume of 12µL including 6ng of DNA, primers at a final  
212 concentration of 300nM and 6µL of SensiFAST™ SYBR lo-ROX (Bioline). Telomere, RAG1 and  
213 COI2 reactions were performed in triplicates on the same plates (10 plates in total); the qPCR  
214 conditions were: 3min at 95°C, followed by 35 cycles of 10 s at 95°C, 15 s at 58°C and 10s at  
215 72°C. A DNA sample being a pool of DNA from 10 adult individuals was used as a reference  
216 sample and was included in triplicate on every plate. The efficiency of each amplicon was  
217 estimated from a standard curve of the reference sample ranging from 1.5 to 24ng. The mean  
218 reaction efficiencies were  $109.1 \pm 1.8\%$  for telomere,  $102.2 \pm 1.6\%$  for RAG1,  $96.3 \pm 1.1\%$  for  
219 COI2. The relative telomere length and *mtDNAcn* of each sample were calculated as  $(1+E_{f_{\text{Tel or COI2}}})^{\Delta C_{q \text{ Tel or COI2}}}/(1+E_{f_{\text{RAG1}}})^{\Delta C_{q \text{ RAG1}}}$ ;  $E_f$  being the amplicon efficiency, and  $\Delta C_q$  the difference in  
220  $C_q$ -values between the reference sample and the focal sample. Intra-plate technical  
221 repeatabilities of telomere and *mtDNAcn* based on triplicates were 0.87 (95% C.I. [0.85-0.89])  
222 and 0.96 (95% C.I. [0.95-0.97]) respectively. Inter-plate technical repeatabilities of telomere  
223 and *mtDNAcn* based on one repeated plate were 0.98 (95% C.I. [0.97-0.99]) and 0.77 (95% C.I.  
224 [0.59-0.88]) respectively.  
225

226 The use of *mtDNAcn* as an index of mitochondrial density has been questioned in human  
227 (Larsen et al., 2012), but we have previously shown good correlations between *mtDNAcn* and  
228 mitochondrial respiration rates in pied flycatcher (Stier et al. 2019). Great tits have quite peculiar  
229 telomeres, characterized notably by some ultra-long telomeres that do not seem to shorten with  
230 age in adults (Atema et al., 2019). Since qPCR only provides an estimate of overall telomere length,  
231 it has been suggested it could be suboptimal for this study species. Yet, relative telomere length  
232 (*i.e.* measured using qPCR) in this species has been shown to shorten during the nestling stage  
233 (Stier et al., 2016, 2015), to respond to environmental factors (*e.g.* hatching asynchrony: (Salmón

234 et al., 2016; Stier et al., 2016, 2015) and to predict adult survival (Salmón et al., 2017). Within-  
235 individual repeatability of telomere length has recently been suggested to be an important factor  
236 to evaluate the pertinence of telomere length data in a given study/species (Kärkkäinen et al.,  
237 n.d.), and the biological repeatability in our dataset was  $R = 0.66$  [0.55-0.79], which is above the  
238 average reported by qPCR studies (*i.e.*  $R = 0.47$ ), and within the upper range of what has been  
239 reported for great tits (Kärkkäinen et al. 2021)

240 Birds were molecularly sexed using a qPCR approach adapted from (Chang et al., 2008;  
241 Ellegren and Fridolfsson, 1997). Forward and reverse sexing primers were 5'-  
242 CACTACAGGGAAACTGTAC-3' (2987F) and 5'- CCCCTTCAGGTTCTTTAAAA -3' (3112R),  
243 respectively. qPCR reactions were performed in a total volume of 12 $\mu$ L including 6ng of DNA,  
244 primers at a final concentration of 800nM and 6 $\mu$ L of SensiFAST™ SYBR® Lo-ROX Kit (Bioline).  
245 qPCR conditions were: 3 min at 95°C, followed by 40 cycles of 45 s at 95°C, 60 s at 52°C and  
246 60s at 72°C, then followed by a melting curve analysis (95°C 60s, 45°C 50s, increase to 95°C at  
247 0.1°C/s, 95°C 30s). Samples were run in duplicates in a single plate and 6 adults of known sex  
248 were included as positive controls. Sex was determined by looking at the dissociation curve,  
249 with two peaks indicating the presence of a Z and W chromosome (female), and one peak  
250 indicating the presence of only the Z chromosomes (male).

251

## 252 Statistical analyses

253 We ran several linear or generalized linear mixed models (LMMs/GLMMs) for both  
254 nestling and juvenile data. In order to account for genetic effects and the effects of growing  
255 environment other than prenatal hormones, we included the IDs of both the nest of origin  
256 (*i.e.* where a nestling hatched) and the nest of rearing (*i.e.* where a nestling grew up) as

257 random intercepts in all suitable models. In models with repeated measurements of the same  
258 individuals, the ID of each individual was included as a random intercept and age as a random  
259 slope to interact with both the original and rearing nests, accounting for the variation in  
260 growth rate between nests. For physiological measurements, assay batch ID was included  
261 either as random intercept or fixed factors (depending on the number of levels, see Tables for  
262 details).

263         To analyze nestling growth, we separated the data into the early (i.e. from day 2 to day  
264 7) and late (i.e. from day 7 to day 14) phases. Because of the start of heating treatment at day  
265 7, this separation allows us to make use of the larger sample size during the early phase and  
266 focus on the nestlings from non-heated nests during the late phase. The fixed factors of these  
267 models included the prenatal hormone treatment (TH versus CO), age, and cross-fostering  
268 (yes or no). For tarsus length, we additionally controlled for the measurer ID as a fixed factor.  
269 The potential effect of brood size (at day 2) was initially explored but subsequently removed  
270 from the models for simplicity because no significant effect was found. Because molecular  
271 sexing was only conducted on nestlings having DNA extracted for mtDNA<sub>cn</sub> and rTL, not all  
272 nestlings included in the growth analyses were sexed. We therefore did not include sex in  
273 order to make use of the full data set. Repeating our models with only the sexed nestlings still  
274 gave qualitatively the same results and did not show sex-specific effects of prenatal THs on  
275 growth. For the juveniles captured during autumn/winter we ran LMMs with hormone  
276 treatment, date of capture, and sex (because of clearer sexual size dimorphism at this age) as  
277 fixed factors.

278         For all models of physiological measurements fixed factors included prenatal hormone  
279 treatment, nestling sex and body mass. Because both mtDNA<sub>cn</sub> and rTL are ratios to a single

280 copy gene, we also z-transformed the data to allow across-study comparison (Verhulst, 2020).  
281 Age was included as a three-level categorical variable (day 7, day 14, and autumn) in order to  
282 estimate the changes of mtDNAcn and rTL between each time point.

283 We used GLMMs to estimate the influence of prenatal thyroid hormones on hatching  
284 success, fledging success (i.e. pre-fledging survival), and post-fledging survival. We modelled  
285 the outcome of each egg (i.e. hatched or not) or nestling (i.e. survived or not) using a logit link  
286 function and specifying a binomial residual distribution. For hatching success, two nests in  
287 which eggs never hatched (i.e. cause of failure likely unrelated to our treatment) were  
288 excluded, giving a final sample size of 354 eggs from 42 nests. The nest ID was treated as a  
289 random intercept, and prenatal hormone treatment and laying date of each nest as fixed  
290 factors. For fledging success, all 131 nestlings (reared in 22 nests after cross-fostering) that  
291 successfully hatched were included in the analysis. The ID of rearing nest was treated as a  
292 random intercept and prenatal hormone treatment, laying date, brood size, and cross-  
293 fostering as fixed factors. For post-fledging survival, the 99 nestlings that successfully fledged  
294 were included in the analysis. The individuals that were never recaptured in the autumn were  
295 presumed dead. In this model, including nest ID as random intercepts caused convergence  
296 problem. We therefore fitted a binomial GLM instead, with prenatal hormone treatment,  
297 cross-fostering, and body mass at day 14 (i.e. the last measurement before fledging) as  
298 predictors.

299 In all statistical models described above, hormone-related two-way interactions were  
300 of interest and therefore included. Following the suggestion by (Schielzeth, 2010), input  
301 variables (except for the technical variables) were mean-centered before model fitting.

302 Significant interactions were further examined by post-hoc interaction analysis using the R  
303 package *emmeans* (Lenth 2021).

304 All LMMs and GLMMs were conducted in the R environment 3.6.1, using the package  
305 *lme4* (Bates et al., 2015) and *ImerTest* (Kuznetsova et al., 2017). P values were determined  
306 using the Kenward-Roger method to approximate the denominator degrees of freedom (R  
307 package *pbkrtest*, (Halekoh and Hojsgaard, 2014), implemented within *ImerTest*) for LMMs  
308 and by Laplace approximation for GLMMs. Model assumptions were diagnosed by using the R  
309 package *DHARMA* (Hartig 2021) and no clear violations were observed except for the models  
310 for plasma T3. Nevertheless, given the fact that the model of T3 did not detect any significant  
311 effect and the general robustness of LMMs (Schielzeth et al., 2020), this did not influence our  
312 conclusion.

313

## 314 **Results**

315 Early body mass growth (between day 2 and day 7 post-hatching) did not differ  
316 between TH-supplemented and control groups (Table 1a, Fig 1a), but individuals from TH-  
317 supplemented eggs grew faster at the later nestling stage, i.e. between day 7 and day 14 post-  
318 hatching (Hormone $\times$ age interaction,  $F_{1,20.18} = 5.423$ ,  $p = 0.030$ , Table 1b, Fig 1b; body mass gain  
319 (mean $\pm$ SE) in TH-nestlings  $0.898 \pm 0.042$  g/day, CO-nestlings  $0.785 \pm 0.043$  g/day). Similarly,  
320 individuals from TH-supplemented eggs expressed faster tarsus growth rate between day 7  
321 and day 14 post-hatching ( $F_{1,32.40} = 4.134$ ,  $p = 0.050$ , Table 1c, TH:  $0.567 \pm 0.032$  mm/day, CO:  
322  $0.475 \pm 0.033$  mm/day, Fig 1c). When analyzing the body mass and tarsus separately for each  
323 age, body mass was slightly smaller on day 2 and day 7 in the TH-supplemented group  
324 compared to control, yet there was no statistically significant difference between the groups

325 at any age (Fig 1, Table S1). In juveniles, there was no difference in body mass or wing length  
326 between the treatment groups (Body mass:  $F_{1,7.24} = 0.012$ ,  $p = 0.916$ ; wing length:  $F_{1,11.48} =$   
327  $0.005$ ,  $p = 0.948$ ).

328 **Table 1.** Linear mixed models of early and late nestling growth in response to prenatal TH-  
329 supplementation.

| <b>(a) Early nestling growth (day 2 – day 7)</b>           |           |          |           |           |          |              |
|------------------------------------------------------------|-----------|----------|-----------|-----------|----------|--------------|
| Random effects:                                            |           | Variance | Std. Dev. |           |          |              |
| Individual ID (n=224)                                      | Intercept | 0.843    | 0.918     |           |          |              |
| Nest of origin (n=42)                                      | Intercept | 0.628    | 0.793     |           |          |              |
|                                                            | Age       | 0.005    | 0.070     |           |          |              |
| Nest of rearing (n=42)                                     | Intercept | 0.057    | 0.239     |           |          |              |
|                                                            | Age       | 0.007    | 0.083     |           |          |              |
| Residual                                                   |           | 0.203    | 0.450     |           |          |              |
| Fixed factors                                              | Estimate  | SE       | t         | df        | F        | p            |
| Intercept                                                  | 8.229     | 0.146    | 56.516    |           |          |              |
| Hormone (TH)                                               | -0.181    | 0.142    | -1.277    | 1, 38.27  | 1.632    | 0.209        |
| Age                                                        | 1.730     | 0.019    | 89.617    | 1, 45.65  | 8031.211 | <0.001       |
| Cross-foster (yes)                                         | -0.139    | 0.069    | -2.006    | 1, 187.94 | 4.025    | <b>0.046</b> |
| Hormone × Age                                              | 0.009     | 0.016    | 0.573     | 1, 28.88  | 0.328    | 0.571        |
| Hormone × Cross-foster                                     | 0.037     | 0.076    | 0.485     | 1, 34.61  | 0.235    | 0.631        |
| <b>(b) Late nestling body mass growth (day 7 – day 14)</b> |           |          |           |           |          |              |
| Random effects:                                            |           | Variance | Std. Dev. |           |          |              |
| Individual ID (n=111)                                      | Intercept | 0.567    | 0.753     |           |          |              |
| Nest of origin (n=36)                                      | Intercept | 0.381    | 0.617     |           |          |              |
|                                                            | Age       | 0.007    | 0.084     |           |          |              |
| Nest of rearing (n=20)                                     | Intercept | 0.003    | 0.058     |           |          |              |
|                                                            | Age       | 0.015    | 0.120     |           |          |              |
| Residual                                                   |           | 0.534    | 0.731     |           |          |              |
| Fixed factors                                              | Estimate  | SE       | t         | df        | F        | p            |
| Intercept                                                  | 15.496    | 0.152    | 101.728   |           |          |              |
| Hormone (TH)                                               | -0.240    | 0.310    | -0.774    | 1, 29.58  | 0.598    | 0.445        |
| Age                                                        | 0.841     | 0.035    | 24.228    | 1, 19.41  | 586.992  | <0.001       |
| Cross-foster (yes)                                         | -0.100    | 0.269    | -0.686    | 1, 32.46  | 0.138    | 0.713        |
| Hormone × Age                                              | 0.113     | 0.049    | 1.853     | 1, 20.18  | 5.423    | <b>0.030</b> |
| Hormone × Cross-foster                                     | 0.321     | 0.643    | 0.500     | 1, 20.30  | 0.250    | 0.623        |
| <b>(c) Late nestling tarsus growth (day 7 – day 14)</b>    |           |          |           |           |          |              |
| Random effects:                                            |           | Variance | Std. Dev. |           |          |              |
| Individual ID (n=111)                                      | Intercept | 0.239    | 0.489     |           |          |              |
| Nest of origin (n=36)                                      | Intercept | 0.221    | 0.470     |           |          |              |
|                                                            | Age       | 0.012    | 0.111     |           |          |              |
| Residual                                                   |           | 0.376    | 0.613     |           |          |              |
| Fixed factors                                              | Estimate  | SE       | t         | df        | F        | p            |
| Intercept                                                  | 20.607    | 0.168    | 122.819   |           |          |              |
| Hormone (TH)                                               | -0.126    | 0.216    | -0.583    | 1, 34.02  | 0.340    | 0.563        |
| Age                                                        | 0.520     | 0.023    | 22.379    | 1, 36.42  | 500.810  | <0.001       |
| Cross-foster (yes)                                         | -0.141    | 0.171    | -0.824    | 1, 51.71  | 0.679    | 0.414        |
| Measurer 2                                                 | 0.235     | 0.180    | 1.306     | 2, 122.11 | 7.626    | <0.001       |
| Measurer 3                                                 | 0.601     | 0.169    | 3.551     |           |          |              |
| Hormone × Age                                              | 0.092     | 0.045    | 2.033     | 1, 32.40  | 4.134    | <b>0.050</b> |
| Hormone × Cross-foster                                     | 0.436     | 0.342    | 1.276     | 1, 52.56  | 1.628    | 0.208        |

Sample sizes:



Early growth, n = 99 control and 119 TH-supplemented at day 2, 104 control and 117 TH-supplemented at day 7  
Late growth, n = 57 control and 54 TH-supplemented at day 7, 50 control and 49 TH-supplemented at day 14

330

331

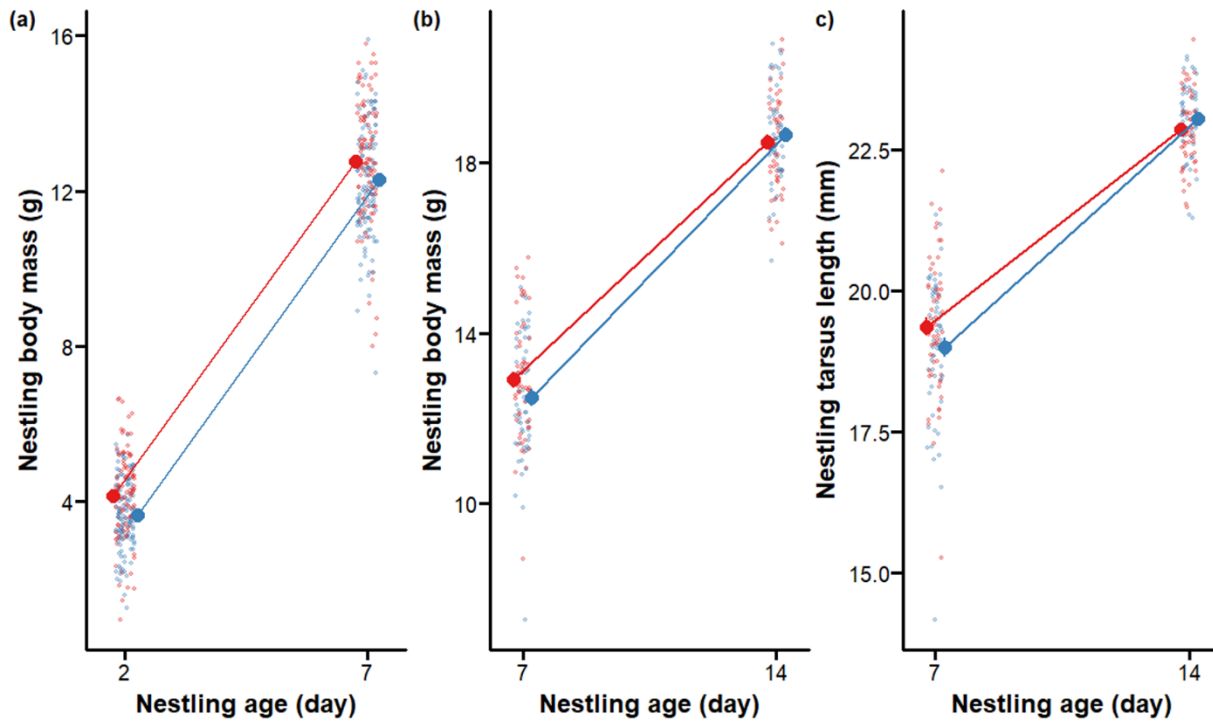

332

333 Fig. 1. Nestling growth in prenatally TH-supplemented (blue dots) and control (red dots)  
334 groups. (a) body mass growth during early nestling stage (day 2 to day 7 post-hatching) (b)  
335 body mass growth late nestling stage (day 7 to day 14 post-hatching), (c) structural size (tarsus)  
336 growth during late nestling stages. Means $\pm$ SE (large dots) and scatter of the raw data (small,  
337 semi-transparent dots) are shown. See sample sizes in the text.

338

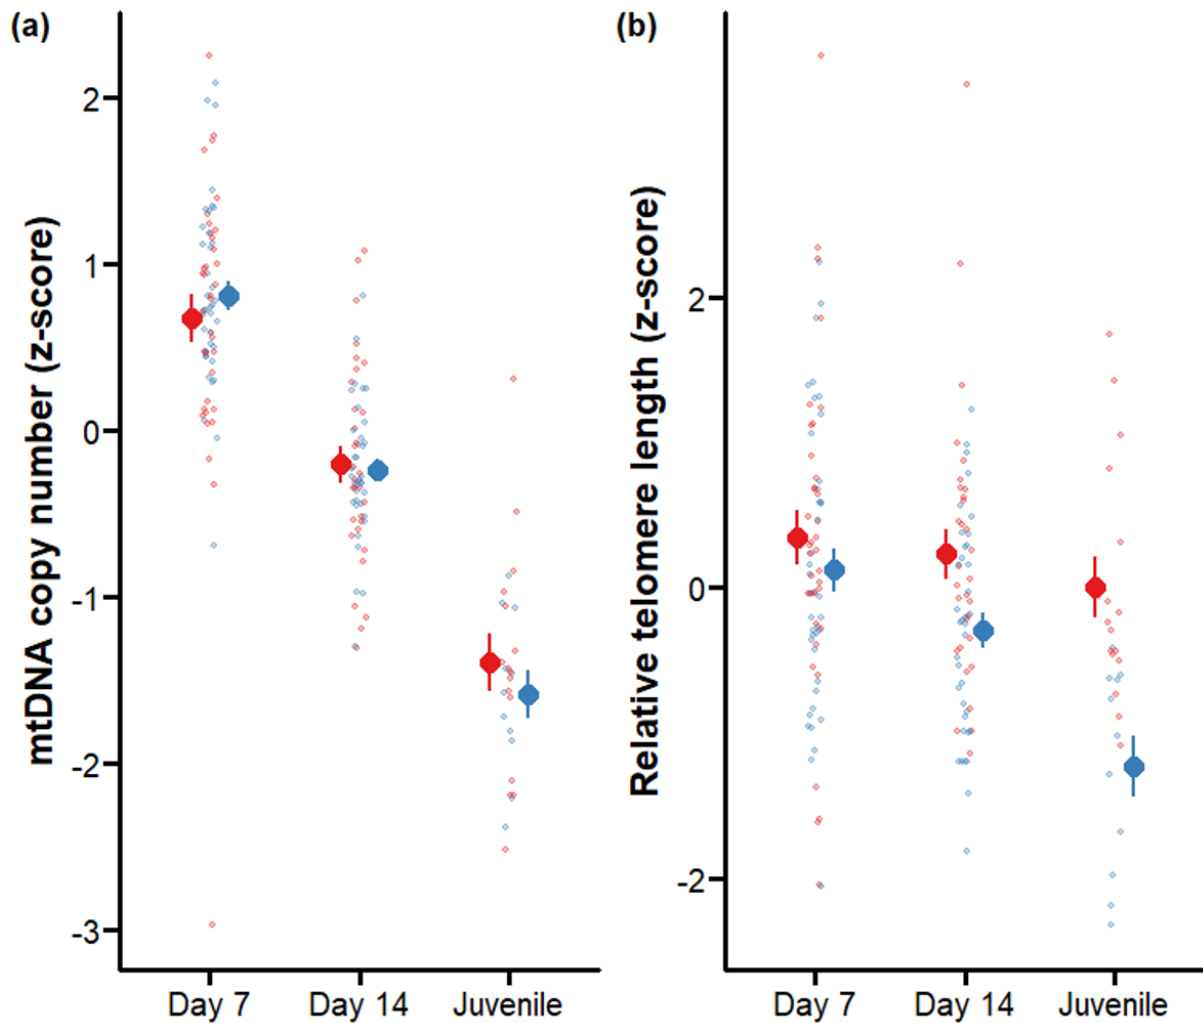

339

340 Fig 2. (a) Relative mitochondrial density (z-scale) and (b) relative telomere length in prenatally

341 TH-supplemented (blue dots) and control groups (red dots) at different developmental stages

342 (day 7 and 14 post-hatching and as juveniles, ca. 3 months of age). Means $\pm$ SE (large dots) and

343 scatter of the raw data (small, semi-transparent dots) are shown. See sample sizes in the text.

344

345 Biomarkers of intracellular oxidative status (total GSH, GSH:GSSG ratio) and damage to lipids

346 14 days post-hatching did not clearly differ among the treatment groups (marginal means $\pm$ SE:

347 total GSH  $\mu$ mol/mg protein: TH-supplemented,  $0.256\pm 0.024$ , control,  $0.244\pm 0.024$ ; GSH:GSSG

348 ratio: TH-supplemented,  $0.051\pm 0.008$ , control,  $0.065\pm 0.011$ ; MDA nmol/mg protein: TH-

349 supplemented,  $0.038 \pm 0.005$ , control,  $0.037 \pm 0.005$ ; Table S2). Plasma T3 and T4 also did not  
350 differ among prenatally TH-supplemented and control groups 14 days post hatching (marginal  
351 means  $\pm$  SE pmol/ml T3: TH-supplemented,  $1.24 \pm 0.21$ , control,  $1.22 \pm 0.23$ ; T4: TH-  
352 supplemented,  $7.38 \pm 1.05$ , control,  $6.60 \pm 1.18$ ; Table S3). Biomarkers of oxidative stress or THs  
353 were not associated with body mass or sex ( $p > 0.06$ , Table S3)

354 Mitochondrial density decreased with age, but there were no clear differences between  
355 prenatally TH-supplemented and control groups at any age (d7, d14 or juveniles, Fig 2a, Table  
356 2). Post-hoc analyses indicated significant decrease between each age category (all Tukey-  
357 adjusted  $p < 0.001$ ), regardless of the hormone treatment. Mitochondrial density was not  
358 associated with sex or body mass (Table 2).

359 Telomere length decreased with age (Table 2, Fig 2b), but the pattern was different  
360 between TH-supplemented and control group (Table 2, Fig 2b): There was no difference  
361 among the prenatally TH-supplemented and control group early in the nestling phase (d7,  
362 Tukey post-hoc test: TH vs control:  $t_{40.6} = 1.357$ ,  $p = 0.182$ ). Telomeres were significantly  
363 shorter (13%) in the TH group on day 14 post-hatching (Tukey post-hoc test, TH vs Control:  
364  $t_{44.1} = 2.548$ ,  $p = 0.014$ ), and this difference was accentuated in juveniles, offspring from TH  
365 supplemented eggs having telomeres being ca. 33% shorter than offspring from control group  
366 (Tukey post-hoc test, TH vs Control:  $t_{106.0} = 3.806$ ,  $p = 0.0002$ ).

367  
368  
369  
370

371 Hatching success did not clearly differ among prenatally TH supplemented and control  
 372 individuals (TH 67.6%, control 69.1%;  $z = 0.314$ ,  $p = 0.754$ ). Nestling survival to fledging was  
 373 marginally, but not statistically significantly higher in differ prenatally TH supplemented than  
 374 and control nestlings (TH: 83.05% vs CO 69.44%,  $z = 0.56$ ,  $p = 0.575$ ). Fledging success was not  
 375 associated with laying date or brood size ( $p > 0.6$ ). Juvenile recapture rate was not significantly  
 376 different across the groups (TH: 28.57% vs CO 34.00%,  $z = -0.46$ ,  $p = 0.645$ ).

377 **Table 2.** Linear mixed models of mitochondrial density and telomere length in blood cells  
 378 growth in response to prenatal TH-supplementation.

| <b>(a) Mitochondria density</b>     |           |          |           |           |         |        |
|-------------------------------------|-----------|----------|-----------|-----------|---------|--------|
| Random effects:                     |           | Variance | Std. Dev. |           |         |        |
| Individual ID (n=78)                | Intercept | 0.088    | 0.297     |           |         |        |
| Nest of origin (n=35)               | Intercept | 0.044    | 0.211     |           |         |        |
| Nest of rearing (n=19)              | Intercept | <0.001   | <0.001    |           |         |        |
| DNA batch (n=8)                     | Intercept | 0.022    | 0.148     |           |         |        |
| Residual                            |           | 0.238    | 0.488     |           |         |        |
| Fixed factors                       | Estimate  | SE       | t         | df        | F       | p      |
| Intercept                           | -0.017    | 0.086    | -0.198    |           |         |        |
| Hormone (TH)                        | -0.014    | 0.140    | -0.098    | 1, 23.49  | 0.010   | 0.923  |
| Sex                                 | 0.225     | 0.128    | 1.756     | 1, 67.12  | 3.083   | 0.084  |
| Age day 7                           | 2.196     | 0.121    | 18.216    | 1, 107.26 | 331.826 | <0.001 |
| Age day 14                          | 1.227     | 0.122    | 10.042    | 1, 107.07 | 100.849 | <0.001 |
| Day-7 body mass                     | -0.069    | 0.068    | -1.015    | 1, 64.04  | 1.030   | 0.314  |
| Hormone × Sex                       | -0.035    | 0.261    | -0.134    | 1, 67.03  | 0.018   | 0.894  |
| Hormone × Age day 7                 | 0.363     | 0.240    | 1.518     | 1, 108.03 | 2.305   | 0.132  |
| Hormone × Age day 14                | 0.196     | 0.242    | 0.808     | 1, 107.99 | 0.652   | 0.421  |
| Hormone × Body mass                 | 0.003     | 0.136    | 0.026     | 1, 66.85  | 0.001   | 0.980  |
| Sex × Age day 7                     | 0.370     | 0.241    | 1.532     | 1, 106.83 | 2.347   | 0.129  |
| Sex × Age day 14                    | 0.076     | 0.245    | 0.311     | 1, 106.76 | 0.097   | 0.757  |
| <b>(b) relative telomere length</b> |           |          |           |           |         |        |
| Random effects:                     |           | Variance | Std. Dev. |           |         |        |
| Individual ID (n=77)                | Intercept | 0.090    | 0.301     |           |         |        |
| Nest of origin (n=35)               | Intercept | 0.028    | 0.167     |           |         |        |
| Nest of rearing (n=19)              | Intercept | 0.057    | 0.238     |           |         |        |
| DNA batch (n=8)                     | Intercept | 0.249    | 0.499     |           |         |        |
| Residual                            |           | 0.518    | 0.720     |           |         |        |
| Fixed factors                       | Estimate  | SE       | t         | df        | F       | p      |
| Intercept                           | -0.086    | 0.202    | -0.427    |           |         |        |
| Hormone (TH)                        | -0.550    | 0.174    | -3.168    | 1, 18.03  | 10.035  | 0.005  |
| Sex                                 | -0.318    | 0.168    | -1.890    | 1, 60.80  | 3.571   | 0.064  |
| Age day 7                           | 0.909     | 0.176    | 5.175     | 1, 113.09 | 26.778  | <0.001 |

|                             |        |       |        |           |        |                  |
|-----------------------------|--------|-------|--------|-----------|--------|------------------|
| <b>Age day 14</b>           | 0.341  | 0.092 | 3.726  | 1, 112.25 | 13.886 | <b>&lt;0.001</b> |
| <b>Day-7 body mass</b>      | 0.100  | 0.090 | 1.116  | 1, 63.08  | 1.246  | 0.268            |
| <b>Hormone × Sex</b>        | 0.087  | 0.334 | 0.262  | 1, 58.01  | 0.069  | 0.794            |
| <b>Hormone × Age day 7</b>  | 0.992  | 0.347 | 2.859  | 1, 116.76 | 8.172  | <b>0.005</b>     |
| <b>Hormone × Age day 14</b> | 0.708  | 0.351 | 2.018  | 1, 114.95 | 4.074  | <b>0.046</b>     |
| <b>Hormone × Body mass</b>  | -0.149 | 0.175 | -0.847 | 1, 62.53  | 0.718  | 0.400            |
| <b>Sex × Age day 7</b>      | -0.231 | 0.351 | -0.657 | 1, 113.82 | 0.432  | 0.513            |
| <b>Sex × Age day 14</b>     | -0.495 | 0.355 | -1.396 | 1, 111.55 | 1.950  | 0.165            |

Sample sizes: n = 37 control and 41 TH-supplemented

379

## 380 Discussion

381 By manipulating prenatal exposure to THs in a wild passerine species, we demonstrate  
382 that an increase in prenatal THs can accelerate both postnatal growth and telomere  
383 shortening. Yet, we did not detect significant effects of elevated prenatal THs on postnatal  
384 oxidative stress levels, cellular energetics measured as mtDNA copy number, circulating TH  
385 levels, or short to medium-term survival (*i.e.* hatching success, fledging success, and apparent  
386 survival to the next autumn/winter). While previous findings suggested potential sex-  
387 dependent effects of prenatal THs in the same species (Ruuskanen et al., 2016a), our results  
388 do not support such a hypothesis.

389 Shorter telomeres in the TH-supplemented group were only detected from 14 days  
390 after hatching onwards, which seems to exclude direct effects of prenatal TH on telomere  
391 dynamics during embryonic development. Yet, this coincides with the accelerated postnatal  
392 body mass and tarsus growth observed in the TH-group (between day 7 and 14) compared to  
393 controls, and faster growth can accelerate telomere shortening either through enhanced cell  
394 division or through inducing oxidative stress (Monaghan and Ozanne, 2018). Considering the  
395 lack of impact of prenatal THs on oxidative stress reported here and in previous work on birds  
396 (Hsu et al., 2020, 2019a; Sarraude et al., 2020a; Sarraude et al., 2020b), it seems unlikely that  
397 the accelerated telomere shortening observed in this study would be linked to increased  
398 oxidative damage on DNA. Yet, we cannot fully rule out this explanation since DNA damage  
399 was not directly assessed and oxidative stress sensitivity might vary between different  
400 biomolecules (Reichert and Stier, 2017). The effect of prenatal THs on telomere length seemed  
401 to increase with age (*i.e.* stronger effect observed in juveniles than at day 14), which could be  
402 explained by a delayed effect of fast postnatal growth (day 7 to day 14) because telomeres

403 only shorten at the subsequent cellular division, and therefore delayed effects are likely to be  
404 observed (Monaghan and Ozanne, 2018). Our hypothesis that prenatal THs could program  
405 postnatal metabolic and endocrine function (and thus affect telomere shortening indirectly)  
406 was not supported as we found no evidence for differences in mitochondrial density or plasma  
407 TH levels (key coordinators of metabolism) across the treatment groups. The latter results are  
408 not fully surprising considering the limited evidence supporting a prenatal programming of  
409 plasma THs (sex-specific effect on T4 only, Hsu et al. 2017; no effect, Hsu et al. 2020) or  
410 mitochondrial density (no effect, Stier et al. 2020; Hsu et al. 2020). According to the *metabolic*  
411 *telomere attrition hypothesis*, telomere shortening is likely to be increased during energy-  
412 demanding periods, and accelerated growth under limited resources is likely carrying a  
413 metabolic cost (Casagrande and Hau, 2019).

414         The effects observed here on telomeres in response to increased prenatal TH levels  
415 are in sharp contrast with our previous findings in another passerine species, the collared  
416 flycatcher (Stier et al. 2020). Indeed, increasing prenatal THs in the collared flycatcher  
417 increased telomere length measured very shortly after hatching (day 2), while not affecting  
418 telomere shortening during postnatal growth (Stier et al. 2020). There are several alternative  
419 explanations for these contrasted findings: (1) we cannot exclude that prenatal THs increased  
420 telomere length during embryonic development in great tits since our first telomere length  
421 measurement (day 7, *ca.* 70% of fledging body mass) was done considerably later than in  
422 collared flycatchers (*i.e.* day 2, *ca.* 20% of fledging body mass). (2) THs differently influenced  
423 post-natal growth in the two species: great tits from the TH-supplemented eggs were initially  
424 slightly smaller, but grew faster in the late nestling period, whereas collared flycatchers from  
425 the TH-supplemented eggs were bigger soon after hatching, but grew slightly slower during  
426 the nestling stage (Hsu et al., 2019a). These contrasting growth patterns may explain, at least

427 partly, the contrasted findings in these two species: an increased metabolic demand for fast  
428 postnatal growth in great tit in response to prenatal TH could accelerate telomere shortening,  
429 while a reduced metabolic demand in collared flycatcher from TH-injected eggs could enable  
430 telomere maintenance (Casagrande and Hau, 2019). Measurements of the mTOR signaling  
431 pathway could shed light on the validity of this hypothesis (Casagrande and Hau, 2019). (3)  
432 The effects of maternal signals on offspring are expected to differ based on environmental  
433 conditions, so called context-dependent effects: For example, prenatal androgens have been  
434 found to differentially influence offspring growth depending on season or food availability  
435 (Groothuis et al., 2020; Muriel et al., 2015). We recently found no evidence for prenatal THs  
436 differentially influencing growth and early-life survival depending on rearing temperature  
437 (Hsu et al. 2020), yet the influence of resource availability was not tested. In two sister species,  
438 collared and pied flycatchers, differential effects of prenatal THs on growth may have been  
439 explained by differences in food resources (Sarraude et al. 2020b). (4) These two species  
440 exhibit different life-histories, as collared flycatchers are migratory and great tits (relatively)  
441 sedentary. Migratory species have generally higher metabolism (Jetz et al., 2008) as well as an  
442 overall faster pace of life (Soriano-Redondo et al. 2021), and may thus present differences in  
443 TH physiology. We may speculate that the telomere maintenance, and role of THs in the  
444 regulation of telomere maintenance may differ across species with different life-histories.  
445 Telomere maintenance is known to be influenced by e.g. species lifespan (Hausmann et al.,  
446 2004) and migratory populations within a species have shorter telomeres (Bauer et al., 2016).  
447 Yet, to our knowledge, studies have not considered migratory vs. non-migratory species in  
448 telomere maintenance. Species-specific effects of the prenatal hormonal environment on  
449 telomere dynamics have already been described: elevated prenatal glucocorticoid levels led  
450 to shorter telomeres in domestic chicken and female zebra finch (Hausmann et al., 2012;



451 Tissier et al., 2014), but to longer telomeres in yellow-legged gull (Noguera, da Silva, and  
452 Velando 2020). To understand if any of these hypotheses is likely to explain the contrasted  
453 effects found here and in Stier et al. (2020), more studies on the impact of prenatal THs on  
454 telomere biology across taxa are needed.

455 To understand the selective pressures on maternal allocation and signaling, it is  
456 important to characterize true fitness effects from development to survival and lifetime  
457 reproductive success. In contrast to our predictions, we found no effects of elevated prenatal  
458 TH-supplementation on apparent survival or individual condition during their first autumn/  
459 winter. Unfortunately, longer-term effects on survival and reproductive success are very  
460 challenging to measure in such an experimental setting in the wild, as the recruitment to first  
461 breeding is usually very low (e.g. < 10% Radersma et al., 2015), which requires a very high  
462 number of nests to be manipulated, something often not feasible for both logistical and ethical  
463 reasons. Yet, long-term effects of accelerated early-life telomere shortening may lead to a  
464 decrease in longer-term survival and lifespan (Eastwood et al., 2019; Heidinger et al., 2012).  
465 The negative effects on later stages suggest that there need to be benefits of high prenatal  
466 THs for the offspring or mother, potentially during early-life stages, where selection can be  
467 strong. In this study, the elevated growth rates could increase offspring competitive abilities  
468 early in life, yet, the effects of prenatal THs on growth seem to be highly inconsistent across  
469 studies (Hsu et al., 2020, 2019a, 2017; Ruuskanen et al., 2016a; Sarraude et al., 2020a;  
470 Sarraude et al., 2020b). While circulating THs are known to be associated with health and  
471 ageing in humans and mammalian models (Bano et al. 2017, 2019; Møllehave et al. 2020), our  
472 study is the first to show that exposure to higher prenatal thyroid hormones can lead to  
473 accelerated cellular ageing measured through telomere length. This should stimulate further

474 research using both epidemiological and experimental approaches across taxa to uncover the  
475 potential regulation of telomere biology by thyroid hormones both pre- and postnatally.

476

#### 477 **Author contribution**

478 BYH, AS & SR designed the study and collected field data. NCS, AS & SR conducted laboratory  
479 work. BYH analyzed the data. BYH, AS & SR wrote the manuscript, with input from NCS.  
480

#### 481 **Acknowledgements**

482 This study was financially supported by the Academy of Finland (#286278 to SR). NCS  
483 acknowledges support from the EDUFI Fellowship and Maupertuis Grant. B-Y.H work was supported  
484 by a grant from the Ella and Georg Ehrnrooth Foundation and Academy of Finland. AS was supported  
485 by a 'Turku Collegium for Science and Medicine' Fellowship and a Marie Skłodowska-Curie Postdoctoral  
486 Fellowship (#894963) at the time of writing. We thank all field assistants, especially Lucas  
487 Bousseau, Thomas Rosille, and Jorma Nurmi for their great effort. All authors declare no  
488 conflict of interest.

489

#### 490 **Data accessibility**

491 All data will be archived and available in Figshare upon acceptance.

#### 492 **References**

493 Aljanabi, S.M., Martinez, I., 1997. Universal and rapid salt-extraction of high quality genomic DNA for  
494 PCR-based techniques. *Nucleic Acids Research*. <https://doi.org/10.1093/nar/25.22.4692>  
495 Arbeev, K.G., Verhulst, S., Steenstrup, T., Kark, J.D., Bagley, O., Kooperberg, C., Reiner, A.P., Hwang,  
496 S.-J., Levy, D., Fitzpatrick, A.L., Christensen, K., Yashin, A.I., Aviv, A., 2020. Association of  
497 Leukocyte Telomere Length With Mortality Among Adult Participants in 3 Longitudinal  
498 Studies. *JAMA Netw Open* 3, e200023.  
499 <https://doi.org/10.1001/jamanetworkopen.2020.0023>

- 500 Atema, E., Mulder, E., van Noordwijk, A.J., Verhulst, S., 2019. Ultralong telomeres shorten with age in  
501 nestling great tits but are static in adults and mask attrition of short telomeres. *Mol Ecol*  
502 *Resour* 19, 648–658. <https://doi.org/10.1111/1755-0998.12996>
- 503 Bano, A., Chaker, L., Mattace-Raso, F.U.S., Terzikhan, N., Kavousi, M., Ikram, M.A., Peeters, R.P.,  
504 Franco, O.H., 2019. Thyroid function and life expectancy with and without noncommunicable  
505 diseases: A population-based study. *PLoS Med* 16, e1002957.  
506 <https://doi.org/10.1371/journal.pmed.1002957>
- 507 Bano, A., Dhana, K., Chaker, L., Kavousi, M., Ikram, M.A., Mattace-Raso, F.U.S., Peeters, R.P., Franco,  
508 O.H., 2017. zeta Association of Thyroid Function With Life Expectancy With and Without  
509 Cardiovascular Disease The Rotterdam Study. *Jama Internal Medicine*.  
510 <https://doi.org/10.1001/jamainternmed.2017.4836>
- 511 Barnes, S.K., Ozanne, S.E., 2011. Pathways linking the early environment to long-term health and  
512 lifespan. *Progress in Biophysics and Molecular Biology* 106, 323–336.  
513 <https://doi.org/10.1016/j.pbiomolbio.2010.12.005>
- 514 Bates, D., Machler, M., Bolker, B.M., Walker, S.C., 2015. Fitting Linear Mixed-Effects Models Using  
515 lme4. *Journal of Statistical Software*. <https://doi.org/10.18637/jss.v067.i01>
- 516 Bauer, C.M., Heidinger, B.J., Ketterson, E.D., Greives, T.J., 2016. A migratory lifestyle is associated  
517 with shorter telomeres in a songbird (*Junco hyemalis*). *Auk*. [https://doi.org/10.1642/auk-16-](https://doi.org/10.1642/auk-16-56.1)  
518 [56.1](https://doi.org/10.1642/auk-16-56.1)
- 519 Casagrande, S., Hau, M., 2019. Telomere attrition: metabolic regulation and signalling function?  
520 *Biology Letters*. <https://doi.org/10.1098/rsbl.2018.0885>
- 521 Chang, H.W., Cheng, C.A., Gu, D.L., Chang, C.C., Su, S.H., Wen, C.H., Chou, Y.C., Chou, T.C., Yao, C.T.,  
522 Tsai, C.L., Cheng, C.C., 2008. High-throughput avian molecular sexing by SYBR green-based  
523 real-time PCR combined with melting curve analysis. *Bmc Biotechnology*.  
524 <https://doi.org/10.1186/1472-6750-8-12>
- 525 Cioffi, F., Senese, R., Lanni, A., Goglia, F., 2013. Thyroid hormones and mitochondria: With a brief  
526 look at derivatives and analogues. *Molecular and Cellular Endocrinology*.  
527 <https://doi.org/10.1016/j.mce.2013.06.006>
- 528 Criscuolo, F., Torres, R., Zahn, S., Williams, T.D., 2020. Telomere dynamics from hatching to sexual  
529 maturity and maternal effects in the ‘multivariate egg.’ *Journal of Experimental Biology* 223,  
530 [jeb232496](https://doi.org/10.1242/jeb.232496). <https://doi.org/10.1242/jeb.232496>
- 531 Eastwood, J.R., Hall, M.L., Teunissen, N., Kingma, S.A., Aranzamendi, N.H., Fan, M., Roast, M.,  
532 Verhulst, S., Peters, A., 2019. Early-life telomere length predicts lifespan and lifetime  
533 reproductive success in a wild bird. *Molecular Ecology*. <https://doi.org/10.1111/mec.15002>
- 534 Ellegren, H., Fridolfsson, A.K., 1997. Male-driven evolution of DNA sequences in birds. *Nat Genet* 17,  
535 182–184. <https://doi.org/10.1038/ng1097-182>
- 536 Entringer, S., de Punder, K., Buss, C., Wadhwa, P.D., 2018. The fetal programming of telomere biology  
537 hypothesis: an update. *Philos Trans R Soc Lond B Biol Sci* 373, 20170151.  
538 <https://doi.org/10.1098/rstb.2017.0151>
- 539 Espin, S., Sanchez Virosta, P., García-Fernández, A., Eeva, T., 2017. A microplate adaptation of the  
540 thiobarbituric acid reactive substances assay to determine lipid peroxidation fluorometrically  
541 in small sample volumes. *Revista de Toxicologia* 34, In press.
- 542 Godfrey, K.M., Barker, D.J., 2001. Fetal programming and adult health. *Public Health Nutr* 4, 611–  
543 624. <https://doi.org/10.1079/phn2001145>
- 544 Groothuis, T.G.G., Kumar, N., Hsu, B.Y., 2020. Explaining discrepancies in the study of maternal  
545 effects: the role of context and embryo. *Current Opinion in Behavioral Sciences*.  
546 <https://doi.org/10.1016/j.cobeha.2020.10.006>
- 547 Halekoh, U., Hojsgaard, S., 2014. Kenward-Roger Approximation and Parametric Bootstrap Methods  
548 for Tests in Linear Mixed Models - The R Package pbrtest. *Journal of Statistical Software*.
- 549 Hartig, F. (2021). DHARMA: Residual Diagnostics for Hierarchical (Multi-Level / Mixed) Regression  
550 Models. R package version 0.4.3. <https://CRAN.R-project.org/package=DHARMA>

- 551 Haussmann, M.F., Longenecker, A.S., Marchetto, N.M., Juliano, S.A., Bowden, R.M., 2012. Embryonic  
552 exposure to corticosterone modifies the juvenile stress response, oxidative stress and  
553 telomere length. *Proceedings of the Royal Society B-Biological Sciences*.  
554 <https://doi.org/10.1098/rspb.2011.1913>
- 555 Haussmann, M.F., Winkler, D.W., Huntington, C.E., Nisbet, I.C.T., Vleck, C.M., 2004. Telomerase  
556 expression is differentially regulated in birds of differing life span. *Strategies for Engineered*  
557 *Negligible Senescence: Why Genuine Control of Aging May Be Foreseeable*.  
558 <https://doi.org/10.1196/annals.1297.029>
- 559 Heidinger, B.J., Blount, J.D., Boner, W., Griffiths, K., Metcalfe, N.B., Monaghan, P., 2012. Telomere  
560 length in early life predicts lifespan. *Proceedings of the National Academy of Sciences* 109,  
561 1743–1748. <https://doi.org/10.1073/pnas.1113306109>
- 562 Hsu, B.Y., Dijkstra, C., Darras, V.M., de Vries, B., Groothuis, T.G.G., 2017. Maternal thyroid hormones  
563 enhance hatching success but decrease nestling body mass in the rock pigeon (*Columba*  
564 *livia*). *General and Comparative Endocrinology*. <https://doi.org/10.1016/j.ygcen.2016.10.011>
- 565 Hsu, B.Y., Doligez, B., Gustafsson, L., Ruuskanen, S., 2019a. Transient growth-enhancing effects of  
566 elevated maternal thyroid hormones at no apparent oxidative cost during early postnatal  
567 period. *Journal of Avian Biology*. <https://doi.org/10.1111/jav.01919>
- 568 Hsu, B.Y., Sarraude, T., Cossin-Sevrin, N., Crombecque, M., Stier, A., Ruuskanen, S., 2020. Testing for  
569 context-dependent effects of prenatal thyroid hormones on offspring survival and  
570 physiology: an experimental temperature manipulation. *Scientific Reports*.  
571 <https://doi.org/10.1038/s41598-020-71511-y>
- 572 Hsu, B.Y., Verhagen, I., Gienapp, P., Darras, V.M., Visser, M.E., Ruuskanen, S., 2019b. Between- and  
573 Within-Individual Variation of Maternal Thyroid Hormone Deposition in Wild Great Tits  
574 (*Parus major*). *American Naturalist*. <https://doi.org/10.1086/704738>
- 575 Jetz, W., Freckleton, R.P., McKechnie, A.E., 2008. Environment, Migratory Tendency, Phylogeny and  
576 Basal Metabolic Rate in Birds. *Plos One*. <https://doi.org/10.1371/journal.pone.0003261>
- 577 Kärkkäinen, T., Briga, M., Laaksonen, T., Stier, A., n.d. Within-individual repeatability in telomere  
578 length: A meta-analysis in nonmammalian vertebrates. *Molecular Ecology* n/a.  
579 <https://doi.org/10.1111/mec.16155>
- 580 Kuznetsova, A., Brockhoff, P.B., Christensen, R.H.B., 2017. lmerTest Package: Tests in Linear Mixed  
581 Effects Models. *Journal of Statistical Software* 82, 1–26.  
582 <https://doi.org/10.18637/jss.v082.i13>
- 583 Larsen, S., Nielsen, J., Hansen, C.N., Nielsen, L.B., Wibrand, F., Stride, N., Schroder, H.D., Boushel, R.,  
584 Helge, J.W., Dela, F., Hey-Mogensen, M., 2012. Biomarkers of mitochondrial content in  
585 skeletal muscle of healthy young human subjects. *J Physiol* 590, 3349–3360.  
586 <https://doi.org/10.1113/jphysiol.2012.230185>
- 587 Length, R.V. (2021). emmeans: Estimated Marginal Means, aka Least-Squares Means. R package  
588 version 1.6.2-1. <https://CRAN.R-project.org/package=emmeans>
- 589 Liu, J.S., Chen, Y.Q., Li, M., 2006. Thyroid hormones increase liver and muscle thermogenic capacity in  
590 the little buntings (*Emberiza pusilla*). *Journal of Thermal Biology*.  
591 <https://doi.org/10.1016/j.jtherbio.2006.01.002>
- 592 López-Otín, C., Blasco, M.A., Partridge, L., Serrano, M., Kroemer, G., 2013. The Hallmarks of Aging.  
593 *Cell* 153, 1194–1217. <https://doi.org/10.1016/j.cell.2013.05.039>
- 594 Marchetto, N.M., Glynn, R.A., Ferry, M.L., Ostojic, M., Wolff, S.M., Yao, R., Haussmann, M.F., 2016.  
595 Prenatal stress and newborn telomere length. *American Journal of Obstetrics and*  
596 *Gynecology* 215, 94.e1-94.e8. <https://doi.org/10.1016/j.ajog.2016.01.177>
- 597 McNabb, F.M.A., 2007. The hypothalamic-pituitary-thyroid (HPT) axis in birds and its role in bird  
598 development and reproduction. *Critical Reviews in Toxicology*.  
599 <https://doi.org/10.1080/10408440601123552>
- 600 Medici, M., Timmermans, S., Visser, W., Keizer-Schrama, S., Jaddoe, V.W.W., Hofman, A., Hooijkaas,  
601 H., de Rijke, Y.B., Tiemeier, H., Bongers-Schokking, J.J., Visser, T.J., Peeters, R.P., Steegers,  
602 E.A.P., 2013. Maternal Thyroid Hormone Parameters during Early Pregnancy and Birth

- 603 Weight: The Generation R Study. *Journal of Clinical Endocrinology & Metabolism*.  
604 <https://doi.org/10.1210/jc.2012-2420>
- 605 Metcalfe, N.B., Monaghan, P., 2001. Compensation for a bad start: grow now, pay later? *Trends in*  
606 *Ecology & Evolution*.
- 607 Møllehave, L.T., Skaaby, T., Linneberg, A., Knudsen, N., Jørgensen, T., Thuesen, B.H., 2020. The  
608 association of thyroid stimulation hormone levels with incident ischemic heart disease,  
609 incident stroke, and all-cause mortality. *Endocrine* 68, 358–367.  
610 <https://doi.org/10.1007/s12020-020-02216-5>
- 611 Monaghan, P., Ozanne, S.E., 2018. Somatic growth and telomere dynamics in vertebrates:  
612 relationships, mechanisms and consequences. *Philos Trans R Soc Lond B Biol Sci* 373,  
613 20160446. <https://doi.org/10.1098/rstb.2016.0446>
- 614 Mullur, R., Liu, Y.-Y., Brent, G.A., 2014. Thyroid Hormone Regulation of Metabolism. *Physiological*  
615 *Reviews* 94, 355–382. <https://doi.org/10.1152/physrev.00030.2013>
- 616 Muñoz-Lorente, M.A., Cano-Martin, A.C., Blasco, M.A., 2019. Mice with hyper-long telomeres show  
617 less metabolic aging and longer lifespans. *Nat Commun* 10, 4723.  
618 <https://doi.org/10.1038/s41467-019-12664-x>
- 619 Muriel, J., Salmon, P., Nunez-Buiza, A., de Salas, F., Perez-Rodriguez, L., Puerta, M., Gil, D., 2015.  
620 Context-dependent effects of yolk androgens on nestling growth and immune function in a  
621 multibrooded passerine. *Journal of Evolutionary Biology*. <https://doi.org/10.1111/jeb.12668>
- 622 Noguera, J.C., da Silva, A., Velando, A., n.d. Egg corticosterone can stimulate telomerase activity and  
623 promote longer telomeres during embryo development. *Molecular Ecology* n/a.  
624 <https://doi.org/10.1111/mec.15694>
- 625 Parolini, M., Possenti, C.D., Caprioli, M., Rubolini, D., Romano, A., Saino, N., 2019. Egg Testosterone  
626 Differentially Affects Telomere Length in Somatic Tissues of Yellow-Legged Gull Embryos.  
627 *Physiological and Biochemical Zoology*. <https://doi.org/10.1086/705037>
- 628 Podmokla, E., Drobniak, S.M., Rutkowska, J., 2018. Chicken or egg? Outcomes of experimental  
629 manipulations of maternally transmitted hormones depend on administration method - a  
630 meta-analysis. *Biological Reviews*. <https://doi.org/10.1111/brv.12406>
- 631 Radersma, R., Komdeur, J., Tinbergen, J.M., 2015. Early morning fledging improves recruitment in  
632 Great Tits *Parus major*. *Ibis* 157, 351–355. <https://doi.org/10.1111/ibi.12230>
- 633 Reichert, S., Stier, A., 2017. Does oxidative stress shorten telomeres in vivo? A review. *Biology*  
634 *Letters*. <https://doi.org/10.1098/rsbl.2017.0463>
- 635 Ruuskanen, S., Darras, V.M., Visser, M.E., Groothuis, T.G.G., 2016a. Effects of experimentally  
636 manipulated yolk thyroid hormone levels on offspring development in a wild bird species.  
637 *Hormones and Behavior*. <https://doi.org/10.1016/j.yhbeh.2016.03.006>
- 638 Ruuskanen, S., Espin, S., Sanchez-Virosta, P., Sarraude, T., Hsu, B.Y., Pajunen, P., Costa, R.A., Eens, M.,  
639 Hargitai, R., Torok, J., Eeva, T., 2019. Transgenerational endocrine disruption: Does elemental  
640 pollution affect egg or nestling thyroid hormone levels in a wild songbird? *Environmental*  
641 *Pollution*. <https://doi.org/10.1016/j.envpol.2019.01.088>
- 642 Ruuskanen, S., Groothuis, T.G.G., Schaper, S.V., Darras, V.M., de Vries, B., Visser, M.E., 2016b.  
643 Temperature-induced variation in yolk androgen and thyroid hormone levels in avian eggs.  
644 *General and Comparative Endocrinology*. <https://doi.org/10.1016/j.ygcn.2016.05.026>
- 645 Ruuskanen, S., Hsu, B.Y., 2018. Maternal Thyroid Hormones: An Unexplored Mechanism Underlying  
646 Maternal Effects in an Ecological Framework. *Physiological and Biochemical Zoology*.  
647 <https://doi.org/10.1086/697380>
- 648 Ruuskanen, S., Hsu, B.-Y., Heinonen, A., Darras, V., Vainio, M., Sarraude, T., Rokka, A., 2018. A new  
649 method for measuring thyroid hormones using nano-LC-MS/MS. *Journal of Chromatography*  
650 *B*.
- 651 Salmón, P., Nilsson, J.F., Nord, A., Bensch, S., Isaksson, C., 2016. Urban environment shortens  
652 telomere length in nestling great tits, *Parus major*. *Biol Lett* 12, 20160155.  
653 <https://doi.org/10.1098/rsbl.2016.0155>

- 654 Salmón, P., Nilsson, J.F., Watson, H., Bensch, S., Isaksson, C., 2017. Selective disappearance of great  
655 tits with short telomeres in urban areas. *Proc Biol Sci* 284, 20171349.  
656 <https://doi.org/10.1098/rspb.2017.1349>
- 657 Sarraude, T., Hsu, B.-Y., Groothuis, T., Ruuskanen, S., 2020a. Manipulation of prenatal thyroid  
658 hormones does not influence growth or physiology in nestling pied flycatchers. *Physiological*  
659 *and Biochemical Zoology*.
- 660 Sarraude, T., Hsu, B.Y., Groothuis, T., Ruuskanen, S., 2020b. Testing the short-and long-term effects  
661 of elevated prenatal exposure to different forms of thyroid hormones. *Peerj*.  
662 <https://doi.org/10.7717/peerj.10175>
- 663 Schielzeth, H., 2010. Simple means to improve the interpretability of regression coefficients.  
664 *Methods in Ecology and Evolution* 1, 103–113. [https://doi.org/10.1111/j.2041-](https://doi.org/10.1111/j.2041-210X.2010.00012.x)  
665 [210X.2010.00012.x](https://doi.org/10.1111/j.2041-210X.2010.00012.x)
- 666 Schielzeth, H., Dingemanse, N.J., Nakagawa, S., Westneat, D.F., Allegate, H., Teplitsky, C., Réale, D.,  
667 Dochtermann, N.A., Garamszegi, L.Z., Araya-Ajoy, Y.G., 2020. Robustness of linear mixed-  
668 effects models to violations of distributional assumptions. *Methods in Ecology and Evolution*  
669 11, 1141–1152. <https://doi.org/10.1111/2041-210X.13434>
- 670 Smith, S.M., Nager, R.G., Costantini, D., 2016. Meta-analysis indicates that oxidative stress is both a  
671 constraint on and a cost of growth. *Ecol Evol* 6, 2833–2842.  
672 <https://doi.org/10.1002/ece3.2080>
- 673 Stier, A., Bize, P., Hsu, B.Y., Ruuskanen, S., 2019. Plastic but repeatable: rapid adjustments of  
674 mitochondrial function and density during reproduction in a wild bird species. *Biology*  
675 *Letters*. <https://doi.org/10.1098/rsbl.2019.0536>
- 676 Stier, A., Delestrade, A., Bize, P., Zahn, S., Criscuolo, F., Massemin, S., 2016. Investigating how  
677 telomere dynamics, growth and life history covary along an elevation gradient in two  
678 passerine species. *Journal of Avian Biology* 47, 134–140. <https://doi.org/10.1111/jav.00714>
- 679 Stier, A., Hsu, B.Y., Marciaiu, C., Doligez, B., Gustafsson, L., Bize, P., Ruuskanen, S., 2020. Born to be  
680 young? Prenatal thyroid hormones increase early-life telomere length in wild collared  
681 flycatchers. *Biology Letters*. <https://doi.org/10.1098/rsbl.2020.0364>
- 682 Stier, A., Massemin, S., Criscuolo, F., 2014. Chronic mitochondrial uncoupling treatment prevents  
683 acute cold-induced oxidative stress in birds. *Journal of Comparative Physiology B-Biochemical*  
684 *Systems and Environmental Physiology*. <https://doi.org/10.1007/s00360-014-0856-6>
- 685 Stier, A., Massemin, S., Zahn, S., Tissier, M.L., Criscuolo, F., 2015. Starting with a handicap: effects of  
686 asynchronous hatching on growth rate, oxidative stress and telomere dynamics in free-living  
687 great tits. *Oecologia*. <https://doi.org/10.1007/s00442-015-3429-9>
- 688 Stier, A., Metcalfe, N.B., Monaghan, P., 2020. Pace and stability of embryonic development affect  
689 telomere dynamics: an experimental study in a precocial bird model. *Proc Biol Sci* 287,  
690 20201378. <https://doi.org/10.1098/rspb.2020.1378>
- 691 Tissier, M.L., Williams, T.D., Criscuolo, F., 2014. Maternal Effects Underlie Ageing Costs of Growth in  
692 the Zebra Finch (*Taeniopygia guttata*). *PLoS One* 9, e97705.  
693 <https://doi.org/10.1371/journal.pone.0097705>
- 694 Verhulst, S., 2020. Improving comparability between qPCR-based telomere studies. *Molecular*  
695 *Ecology Resources* 20, 11–13. <https://doi.org/10.1111/1755-0998.13114>
- 696 Vrijkotte, T.G.M., Hrudehy, E.J., Twickler, M.B., 2017. Early Maternal Thyroid Function During  
697 Gestation Is Associated With Fetal Growth, Particularly in Male Newborns. *The Journal of*  
698 *Clinical Endocrinology & Metabolism* 102, 1059–1066. <https://doi.org/10.1210/jc.2016-3452>
- 699 Welcker, J., Chastel, O., Gabrielsen, G.W., Guillaumin, J., Kitaysky, A.S., Speakman, J.R., Tremblay, Y.,  
700 Bech, C., 2013. Thyroid Hormones Correlate with Basal Metabolic Rate but Not Field  
701 Metabolic Rate in a Wild Bird Species. *Plos One*.  
702 <https://doi.org/10.1371/journal.pone.0056229>
- 703 Wilbourn, R.V., Moatt, J.P., Froy, H., Walling, C.A., Nussey, D.H., Boonekamp, J.J., 2018. The  
704 relationship between telomere length and mortality risk in non-model vertebrate systems: a

705 meta-analysis. Philosophical Transactions of the Royal Society B-Biological Sciences.  
706 <https://doi.org/10.1098/rstb.2016.0447>  
707 Zhang, C., Yang, X., Zhang, Y., Guo, F., Yang, S., Peeters, R.P., Korevaar, T.I.M., Fan, J., Huang, H.-F.,  
708 2019. Association Between Maternal Thyroid Hormones and Birth Weight at Early and Late  
709 Pregnancy. The Journal of Clinical Endocrinology & Metabolism 104, 5853–5863.  
710 <https://doi.org/10.1210/jc.2019-00390>

711

712

713 Add: L

714
